# Supplementary material
Source: publisher figshare collection journal article supplement (https://tandf.figshare.com/ndownloader/files/14736980)
Supplement: Supplementary file 1 [file 14736980]

**Supplementary Information**

SI. 1. Zeta potential of Ag-PANI/CNT composite


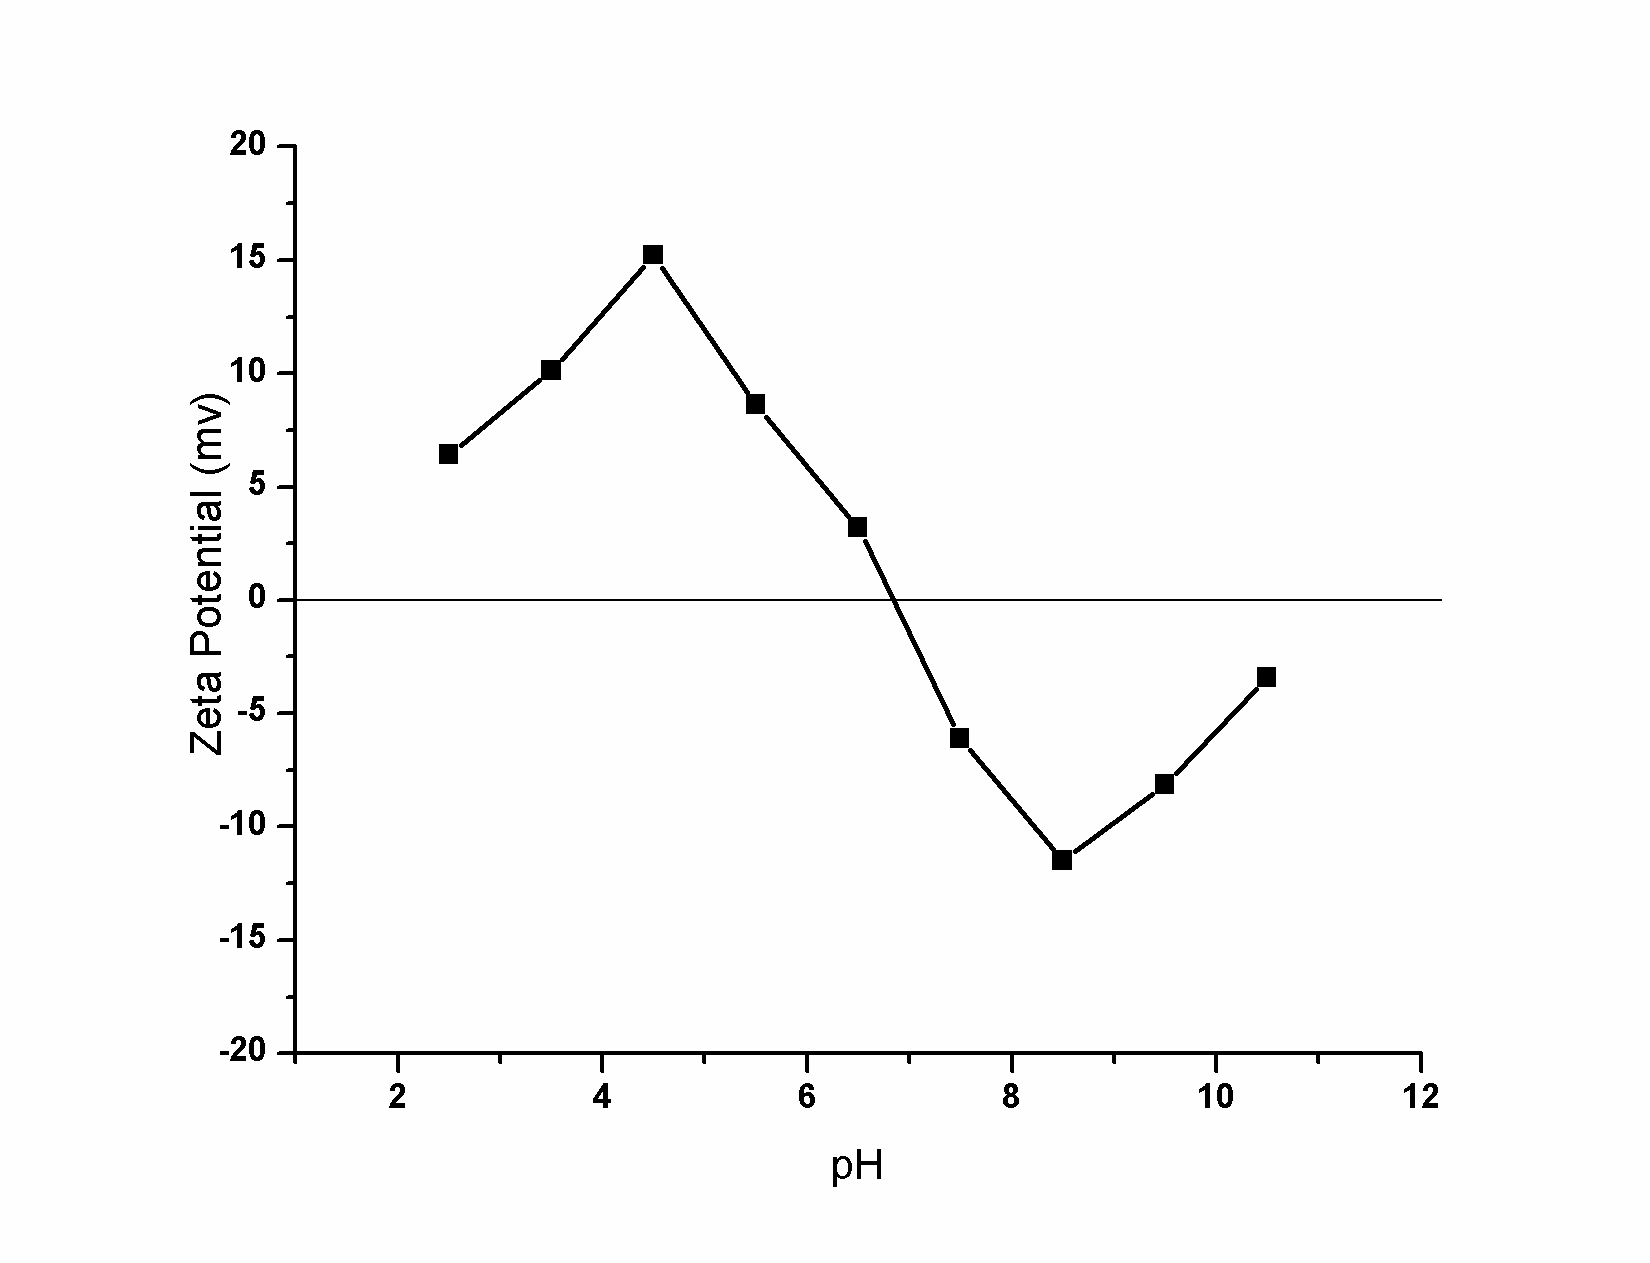


Table S1. The 4-factor central composite design matrix and the value of response function BBG (%).

|  | Factor 1 | Factor 2 | Factor 3 | Factor 4 | Response 1 |  | |
| --- | --- | --- | --- | --- | --- | --- | --- |
| Run | A:Concentration | B:Time | C:Dose | D:pH | Removal % | Removal % | |
|  |  | min | gm |  | Actual Value | Predicted | |
| 1 | 1E-05 | 20 | 0 | 4 | 48.65 | 50.89 | |
| 2 | 1E-05 | 50 | 0.01 | 4 | 89.86 | 89.25 | |
| 3 | 5E-06 | 5 | 0.015 | 6 | 75.6 | 75.74 | |
| 4 | 0 | 20 | 0.01 | 4 | 57.54 | 59.41 | |
| 5 | 1E-05 | 20 | 0.01 | 4 | 98.7 | 98.70 | |
| 6 | 1.5E-05 | 5 | 0.015 | 2 | 62.87 | 62.84 | |
| 7 | 1.5E-05 | 35 | 0.005 | 2 | 61.97 | 63.73 | |
| 8 | 1.5E-05 | 35 | 0.005 | 6 | 88.06 | 86.26 | |
| 9 | 5E-06 | 35 | 0.005 | 2 | 58.93 | 55.41 | |
| 10 | 5E-06 | 35 | 0.015 | 2 | 72.04 | 73.83 | |
| 11 | 1.5E-05 | 35 | 0.015 | 2 | 83.19 | 80.40 | |
| 12 | 2E-05 | 20 | 0.01 | 4 | 81.32 | 79.85 | |
| 13 | 1E-05 | 20 | 0.01 | 4 | 98.7 | 98.70 | |
| 14 | 5E-06 | 5 | 0.005 | 2 | 32.75 | 29.74 | |
| 15 | 1E-05 | 20 | 0.01 | 4 | 98.7 | 98.70 | |
| 16 | 1.5E-05 | 5 | 0.015 | 6 | 86.64 | 87.86 | |
| 17 | 1.5E-05 | 35 | 0.015 | 6 | 98.7 | | 103.61 |
| 18 | 1E-05 | 20 | 0.01 | 4 | 98.7 | | 98.70 |
| 19 | 1E-05 | 20 | 0.01 | 4 | 98.7 | | 98.70 |
| 20 | 1E-05 | 20 | 0.01 | 0 | 42.51 | | 45.89 |
| 21 | 1.5E-05 | 5 | 0.005 | 2 | 44.65 | | 43.81 |
| 22 | 5E-06 | 35 | 0.015 | 6 | 98.7 | | 97.24 |
| 23 | 1E-05 | 20 | 0.01 | 8 | 96.63 | | 93.65 |
| 24 | 5E-06 | 5 | 0.005 | 6 | 53.8 | | 54.29 |
| 25 | 1E-05 | -10 | 0.01 | 4 | 46.83 | | 47.84 |
| 26 | 1.5E-05 | 5 | 0.005 | 6 | 68.06 | | 68.17 |
| 27 | 1E-05 | 20 | 0.02 | 4 | 90.85 | | 89.01 |
| 28 | 1E-05 | 20 | 0.01 | 4 | 98.7 | | 98.70 |
| 29 | 5E-06 | 5 | 0.015 | 2 | 51.02 | | 50.52 |
| 30 | 5E-06 | 35 | 0.005 | 6 | 76.21 | | 78.14 |

Table S2. The results of ANOVA analysis for the developed response surface model.

| **Source** | **Sum of Squares** | **df** | **Mean Square** | **F-value** | **p-value** |  |
| --- | --- | --- | --- | --- | --- | --- |
| **Model** | 12949.13 | 14 | 924.94 | 129.42 | < 0.0001 | significant |
| A-Concentration | 626.79 | 1 | 626.79 | 87.70 | < 0.0001 |  |
| B-Time | 2572.39 | 1 | 2572.39 | 359.93 | < 0.0001 |  |
| C-Dose | 2179.89 | 1 | 2179.89 | 305.01 | < 0.0001 |  |
| D-pH | 3422.24 | 1 | 3422.24 | 478.84 | < 0.0001 |  |
| AB | 33.09 | 1 | 33.09 | 4.63 | 0.0481 |  |
| AC | 3.07 | 1 | 3.07 | 0.4297 | 0.5220 |  |
| AD | 0.0390 | 1 | 0.0390 | 0.0055 | 0.9421 |  |
| BC | 5.53 | 1 | 5.53 | 0.7744 | 0.3928 |  |
| BD | 3.30 | 1 | 3.30 | 0.4622 | 0.5070 |  |
| CD | 0.4523 | 1 | 0.4523 | 0.0633 | 0.8048 |  |
| A² | 1448.64 | 1 | 1448.64 | 202.69 | < 0.0001 |  |
| B² | 1558.80 | 1 | 1558.80 | 218.11 | < 0.0001 |  |
| C² | 1416.92 | 1 | 1416.92 | 198.26 | < 0.0001 |  |
| D² | 1434.72 | 1 | 1434.72 | 200.75 | < 0.0001 |  |
| **Residual** | 107.20 | 15 | 7.15 |  |  |  |
| Lack of Fit | 107.20 | 10 | 10.72 |  |  |  |
| Pure Error | 0.0000 | 5 | 0.0000 |  |  |  |
| **Cor Total** | 13056.33 | 29 |  |  |  |  |
